# Supplementary material for: The Botrytis cinerea Crh1 transglycosylase is a cytoplasmic effector triggering plant cell death and defense response
Source: PubMed Central journal article supplement (PMC8042016; doi:10.1038/s41467-021-22436-1), 2021-04-12
Supplement: 41467_2021_22436_MOESM1_ESM.pdf [file 41467_2021_22436_MOESM1_ESM.pdf]

# The *Botrytis cinerea* Crh1 transglycosylase is a cytoplasmic effector triggering plant cell death and defense response

Kai Bi *et al*

## Supplementary Figures

**Supplementary Fig. 1. Phylogenetic and multiple sequence alignment of *B. cinerea* Crh family proteins.** **a** Schematic presentation of predicted signal peptide (green) and GH16 domain (blue) of BcCrh proteins. Multiple sequence alignment (MSA) analysis of *B. cinerea* Crh proteins and their homologues from other species was generated by Clustal Omega online tool. Due to the C-terminus residues with low sequence identity, amino acid residues 1-277 of BcCrh1 were used for alignment. **b** Neighbor-joining tree of Crh proteins was generated based on the MSA result. The four *B. cinerea* proteins are marked by stars. **c** MSA results reformatted by Mview. Two highly conserved Cys residues are marked by red stars. Other conserved residues are color shaded. The conserved catalytic activity motif and the acceptor sugar binding motif are boxed by red rectangle. Af – *Aspergillus fumigatus*, Sc – *Sccharomyces cerevisiae*, Ca – *Candida albincas*.

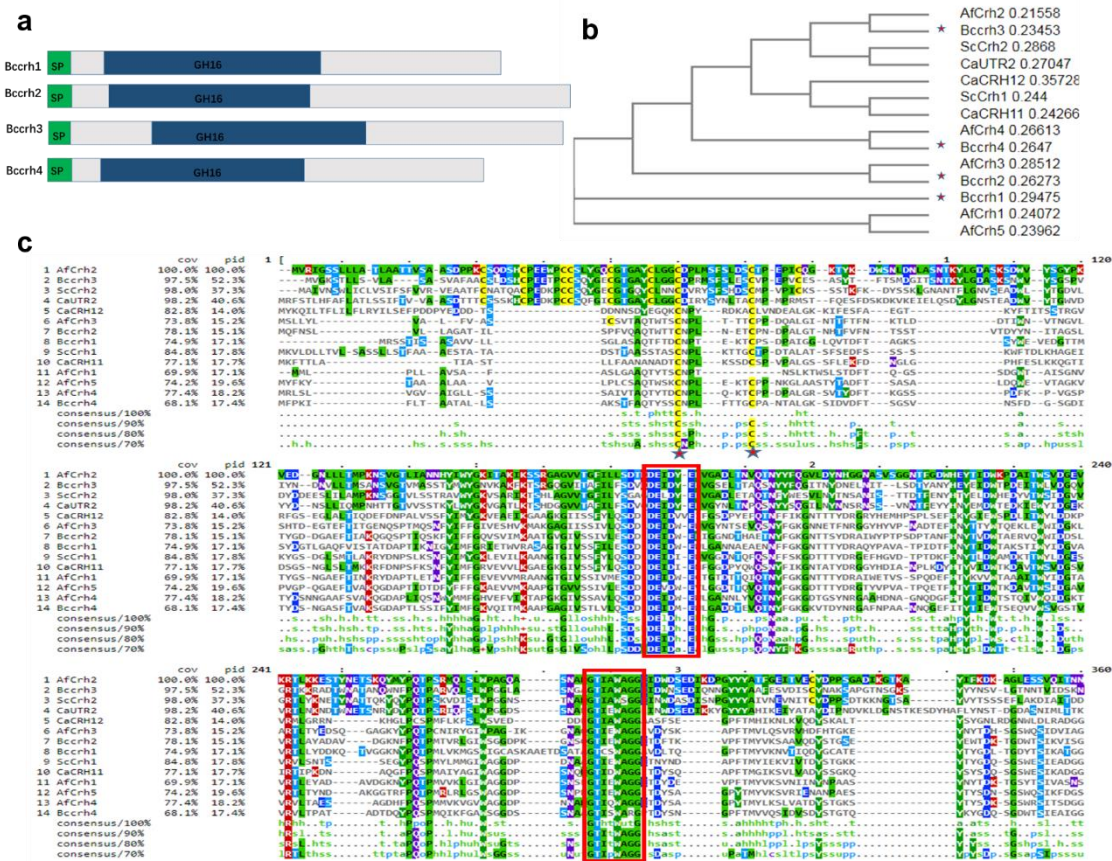

14

15

16 **Supplementary Fig. 2. 3D structural models prediction of BcCrh1.** HHpred was used for modeling template search against  
 17 the PDB database. The Crh5 transglycosylase from *Aspergillus fumigatus* (PDB entry 6IBW, UniProt entry Q8J0P4) was  
 18 identified as the best template for modelling with 48% sequence identity to BcCrh1 (Probability 100%, E-value 1.1e-32). The  
 19 ConSurf webserver was used to collect homologues from the clean UniProt database, the pairwise alignment of B1084 (later  
 20 called BcCrh1) and the template was deduced from the multiple sequence alignment. 100 different models were generated by  
 21 MODELLER-9.18 with default parameters, and following a short energy minimization using GROMACS-5.1 and the  
 22 AMBER99SB-ILDN force field, the model with the predicted lowest energy was chosen. **a** The model structure of BcCrh1  
 23 monomer colored based on evolutionary conservation with turquoise-through-maroon representing variable-through-  
 24 conserved residues respectively. The C26 and C33 at the N-terminus (highlighted in colored-spheres) form a disulfide bond  
 25 and are both highly conserved among Crh protein members. **b-g** Predicted potential dimerization interfaces of BcCrh1 colored  
 26 as in **a**. The PISA webserver ([http://www.ebi.ac.uk/pdbe/prot\\_int/pistart.html](http://www.ebi.ac.uk/pdbe/prot_int/pistart.html)) and the crystal structure of 6IBW were used to  
 27 test potential dimerization interfaces of BcCrh1. Two different topologies of the dimer were predicted based on the analysis.  
 28 Schematic ribbon diagram of dimerized BcCrh1 model are shown (the top view, bottom view and dimerization interface). **b**,  
 29 **c** and **f**: “head-to-head” topology of the dimer. **d**, **e** and **g**: “head-to-tail” topology of the dimer.

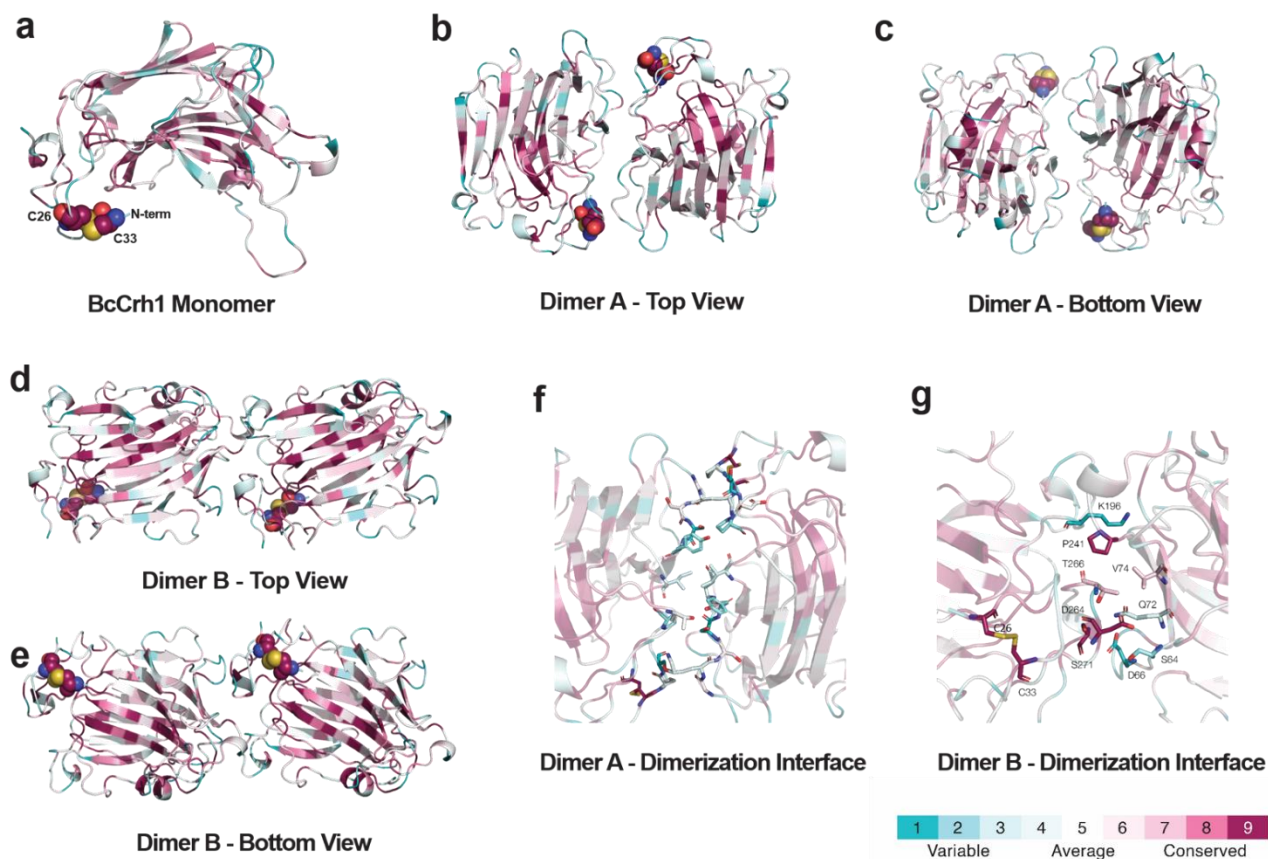

31 **Supplementary Fig. 3. Induction of plant cell death by BcCrh1.** a *N. benthamiana* leaves were infiltrated with  
32 Agrobacterium harbors construct encoding GFP (35S:GFP), native (35S:BcCrh1) or the enzymatic inactive (35S:MBcCrh1)  
33 BcCrh1. Images were taken five days after agroinfiltration. b Cell death inducing activity of the BcCrh1<sup>C26AC33A</sup> mutant protein  
34 was tested by agroinfiltration assay of *N. benthamiana* leaves. Representative pictures of *N. benthamiana* were taken at 5 d  
35 after infiltration. c Representative *N. benthamiana* leaves five days after agroinfiltration with constructs expressing BcCrh1<sup>21-</sup>  
36 <sup>391</sup>, CBL1n-BcCrh1<sup>21-391</sup> (Myristoylation signal), NLS-BcCrh1<sup>21-391</sup> (Nuclear localization signal) and nls-BcCrh1<sup>21-391</sup> (Mutant  
37 form of nuclear localization signal).

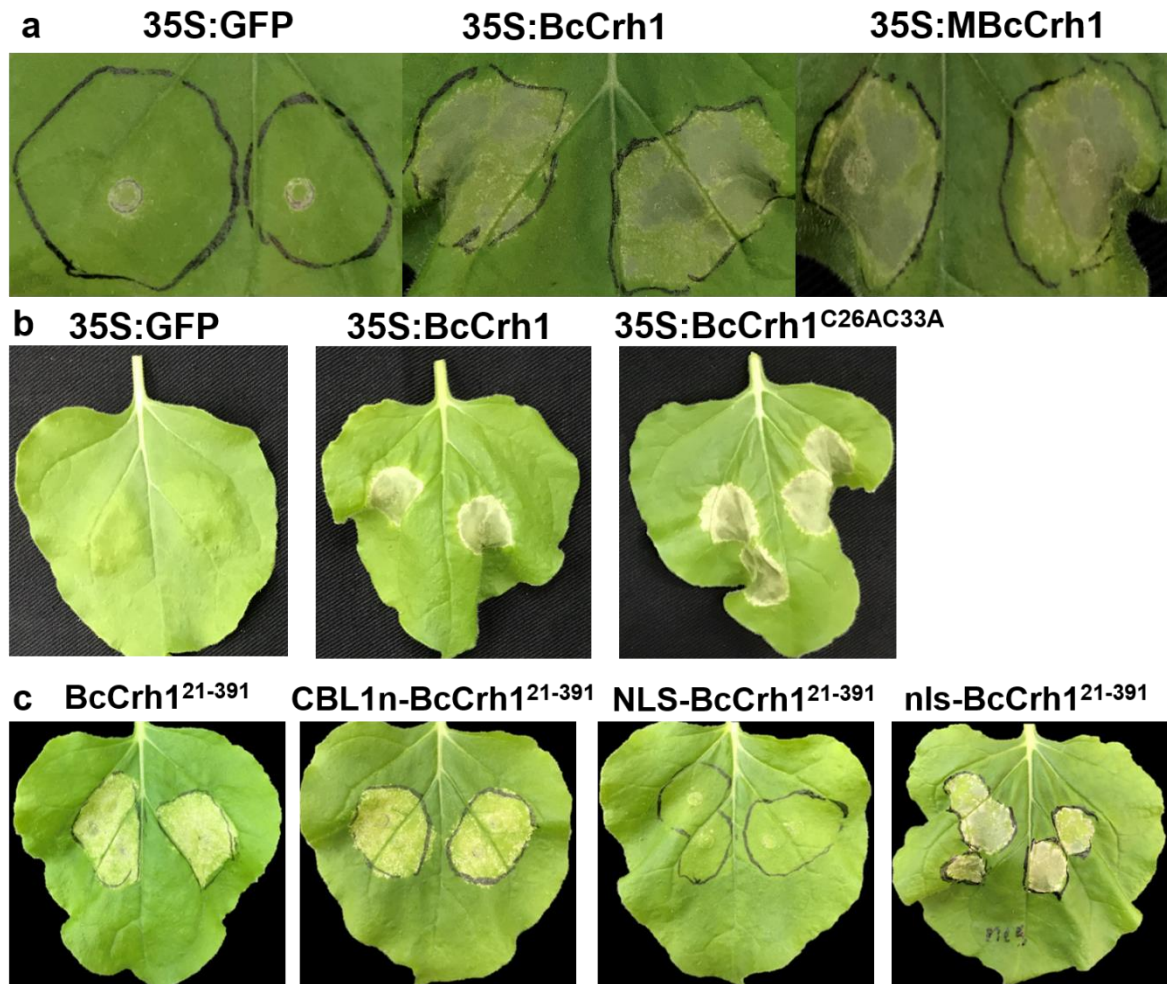

39 **Supplementary Fig. 4. Induction of cell death by BcCrh1 in different plant species.** **a** Response of *N. benthamiana* leaves  
40 to different concentrations of purified BcCrh1 and MBcCrh1 protein. Pictures were taken two days after treatment. **b**  
41 Infiltration assay of Tomato, *A. thaliana* and maize leaves. Leaves were infiltrated with 11  $\mu$ M of purified protein, pictures of  
42 representative leaves were taken two days after treatment. White dash line shows the boundary of infiltration area.

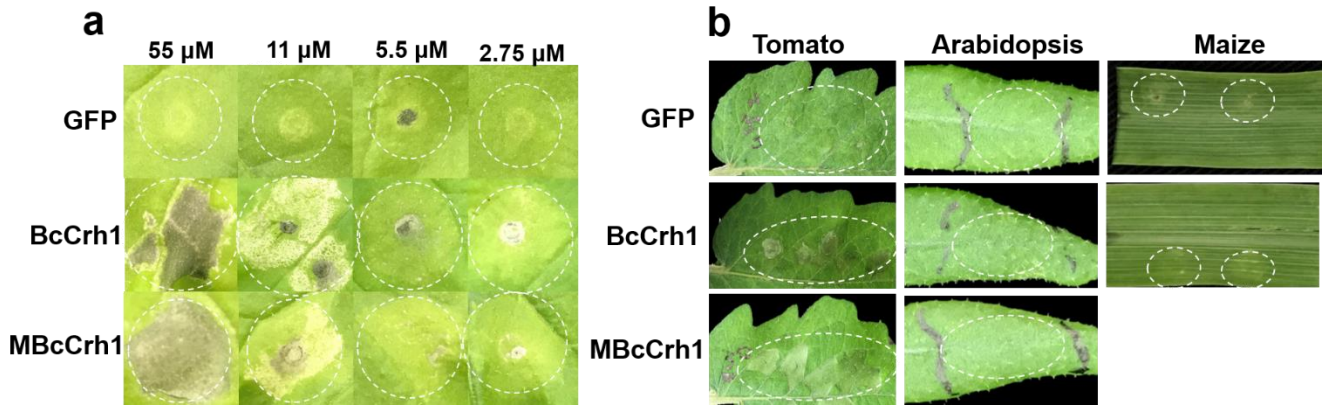

43

44

45 **Supplementary Fig. 5. Quantification of necrosis induced by different parts of the BcCrh1 protein.** a *N. benthamiana*  
 46 leaves were Agroinfiltrated with the indicated BcCrh1 fragments, leaf samples were collected after five days and stained with  
 47 trypan blue. b Relative staining intensity was measured by ImageJ. For each treatment, 10 samples from three independent  
 48 biological replications were used for statistical analysis. Center lines of box plots represent the medians, box edges show the  
 49 25th and 75th percentiles; whiskers extend to minimum and maximum values from the 25th and 75th percentiles; all present  
 50 data are indicated as black dots. Different letters indicate statistically significant differences ( $P \leq 0.01$ , one-way ANOVA).

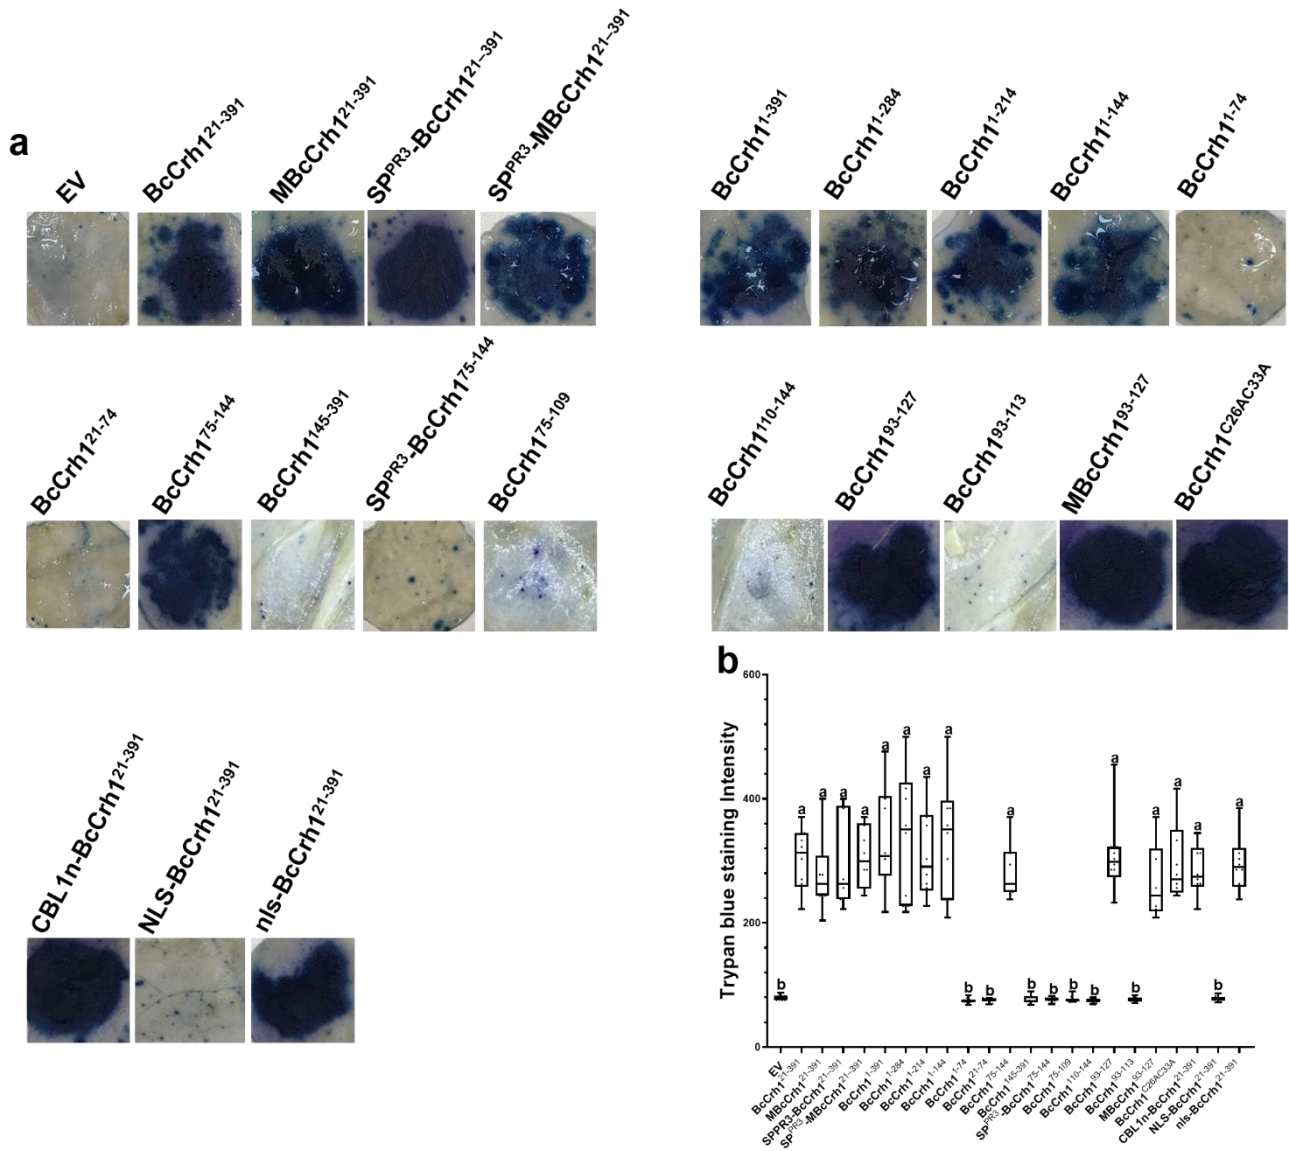

52 **Supplementary Fig. 6. Complementation assay of Crh-deficient *S. cerevisiae* strain.** *S. cerevisiae* *crh1*Δ *crh2*Δ cells,  
 53 which are completely deficient of Crh activity and hypersensitive to Congo red were transformed with BcCrh1, MBcCrh1 or  
 54 BcCrh1<sup>C26AC33A</sup>. **a** Cells of the different strains were grown to mid-log phase at 24°C in SD-Ura overnight, cultures were  
 55 diluted to 3×10<sup>6</sup> cells ml<sup>-1</sup> and then further five 1:5 serial dilutions. Five microliters of cell suspension were spotted onto YPD  
 56 solid medium (control) or YPD supplemented with 50 μg/mL, 100 μg/mL, 150 μg/mL and 200 μg/mL Congo red and then  
 57 plates were incubated for three days at 30°C. **b** Protein expression. Total proteins were extracts from exponential cultures and  
 58 subjected to 10% SDS/PAGE and Western blot analysis using anti-c-myc monoclonal antibody (top). Total protein loading  
 59 was evaluated by coomassie brilliant blue staining (Bottom).  
 60

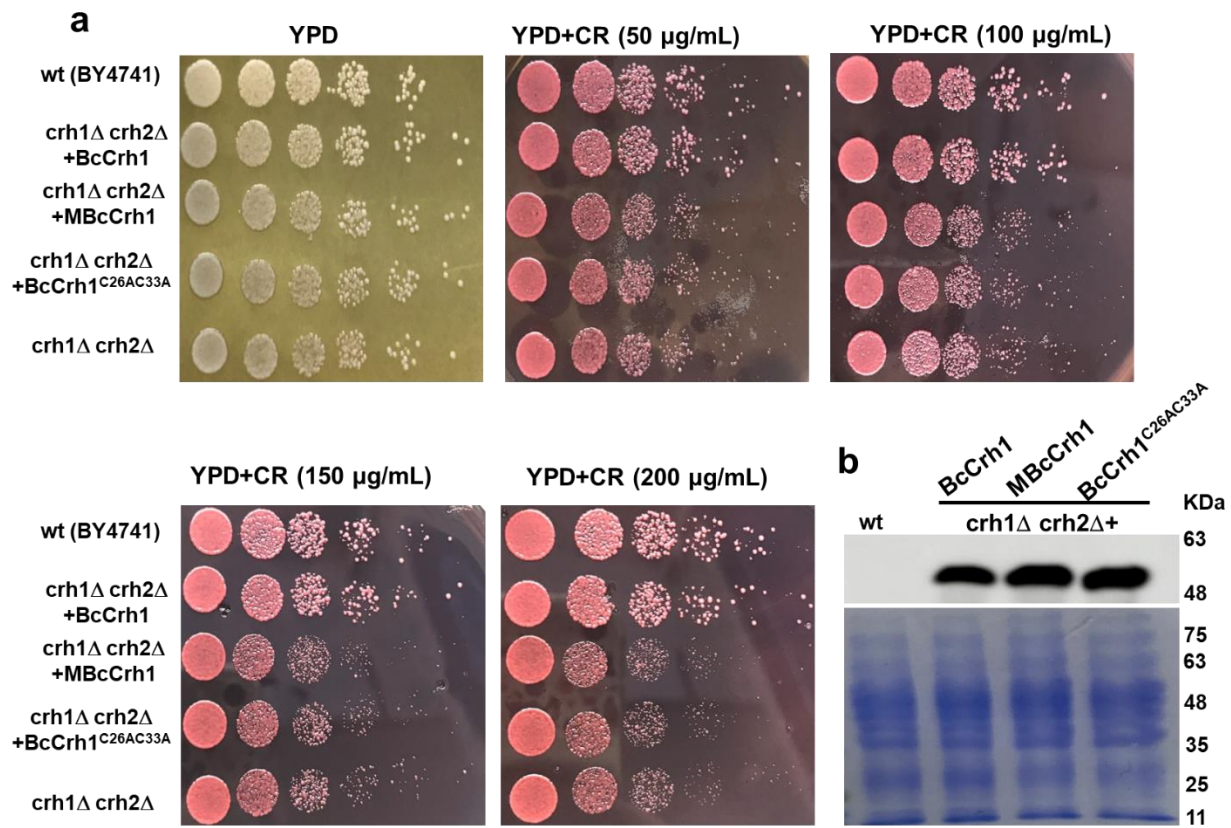

61  
62 **Supplementary Fig. 7. *bccrh1* gene expression during saprophytic and pathogenic development.** *bccrh1* expression  
63 levels were evaluated by qRT-PCR with the *bcgpdh* as a reference gene for normalization. Mean and standard deviations were  
64 calculated from three biological replications. The relative expression levels were calculated using the comparative Ct method.  
65 Expression level of *bccrh1* at 0 h was set as 1.

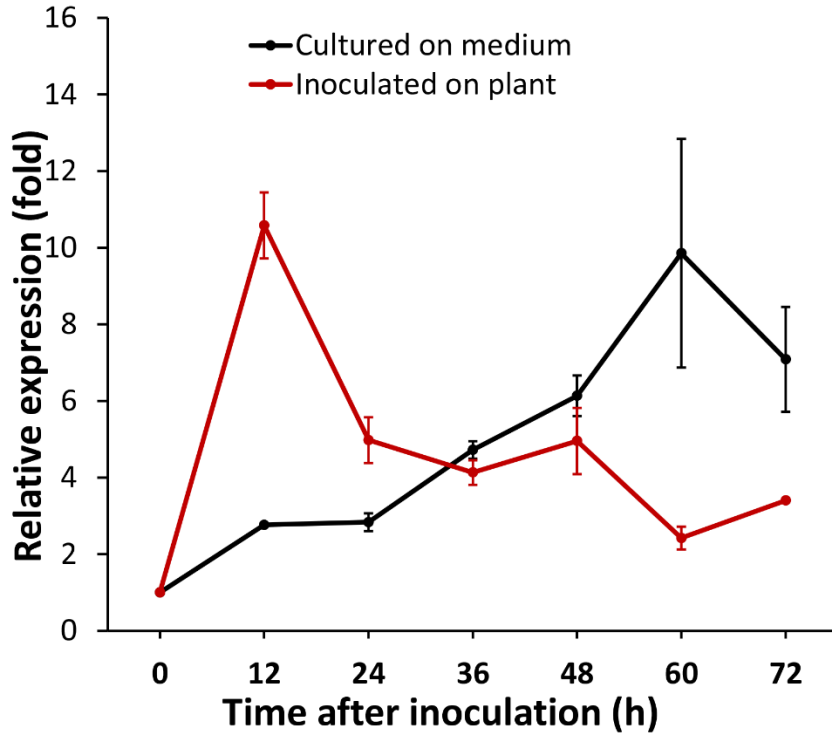

66  
67

68 **Supplementary Fig. 8. Secretion of Bccrh1 during plant infection.** Onion epidermis was inoculated with spore suspension  
69 of a *B. cinerea* strain that expresses BcCrh1-GFP fusion protein. Samples were scanned by a confocal microscope. Images  
70 show continuous z-series of different infection states. **a, b** Protein localization to hyphal tips in early time points (12, 21 hpi,  
71 arrowhead); **c** Protein localization secretion in infection structures (36 hpi, asterisks). Bar = 20  $\mu$ m. The experiments were  
72 repeated three times with similar results obtained.

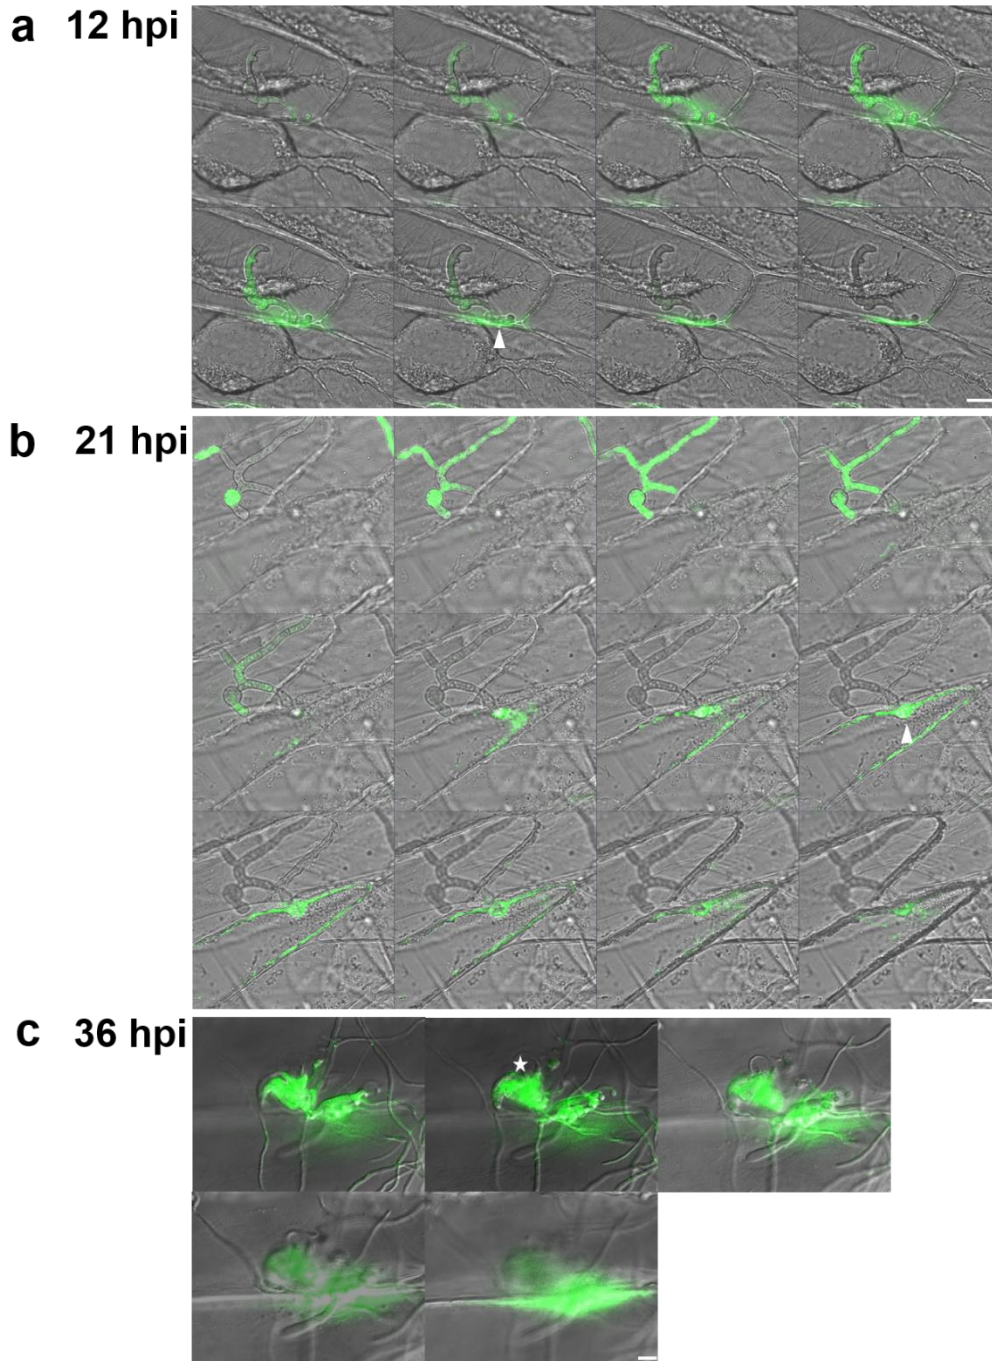



74 **Supplementary Fig. 9. Developmental phenotypes of *B. cinerea* mutant strains.** **a** Hyphal growth rate. Fungi were grown on  
75 GB5+Glucose plates at 22°C with continuous fluorescent light. Radial growth was measured daily for three days and growth rate (mm/d)  
76 was calculated. Data represent mean  $\pm$  SD (n = 6) from three independent biological replications. **b** Spore germination. Values stand for  
77 mean  $\pm$  SD from three independent biological replications, at least 120 spores were counted in each replication. **c** Effect of cell wall stressor  
78 on colony radial growth. Fungi were cultured on GB5+Glucose medium with or without 300  $\mu$ g/ml Congo red (CR), colony diameter was  
79 measured after three days. Data represent the means  $\pm$  SD from three independent biological replications. In the graphs, ns = no statistical  
80 differences at  $P \leq 0.01$  according to one-way ANOVA. **d** Infection cushion formation. Conidia were suspended in GB5+2% Gluc medium,  
81 density was adjusted  $10^4$  conidia  $\text{ml}^{-1}$  and 10  $\mu$ l of the suspension were applied to a glass slide and incubated in a moist chamber at 22°C.  
82 Pictures were taken after 36 h of incubation. Red rings and arrow indicate the typical and abnormal infection cushions, respectively. Notably,  
83 at this stage, all strains except  $\Delta/\text{OE-MBcCrh1}$  formed normal infection cushions. Strain designation: wt – B05.10 wild type,  $\Delta\text{BcCrh1}$  –  
84 *bccrh1* deletion, OE-BcCrh1 – *bccrh1* over-expression, OE-MBcCrh1 – over-expression of enzyme inactive *bccrh1*,  $\Delta/\text{NP-MBcCrh1}$  –  
85 over-expression of the enzyme inactive *bccrh1* from native *bccrh1* promoter in background of *bccrh1* deletion,  $\Delta/\text{OE-MBcCrh1}^{\text{C26AC33A}}$  – over-  
86 over-expression of enzyme inactive *bccrh1* with mutations in C26 and C33 in background of *bccrh1* deletion. Bar = 20  $\mu$ m. Images are from a  
87 single experiment that was repeated three times with similar results. **e** Pathogenicity assay. Intact and artificially wounded bean leaves were  
88 inoculated with wild type and  $\Delta/\text{OE-MBcCrh1}$  spore suspensions, the plants were incubated in a moist chamber for three days and then  
89 pictures were taken and lesion diameter was measured. At least 18 sample points from three independent biological replications were used  
90 for statistical analysis. Box limits shows the 25th and 75th percentiles, the center lines of Boxplots indicate the medians values; whiskers  
91 extend to minimum and maximum values; all present data are indicated as black dots. Different letters indicate statistical differences at  $P \leq$   
92 0.01 according to one-way ANOVA.

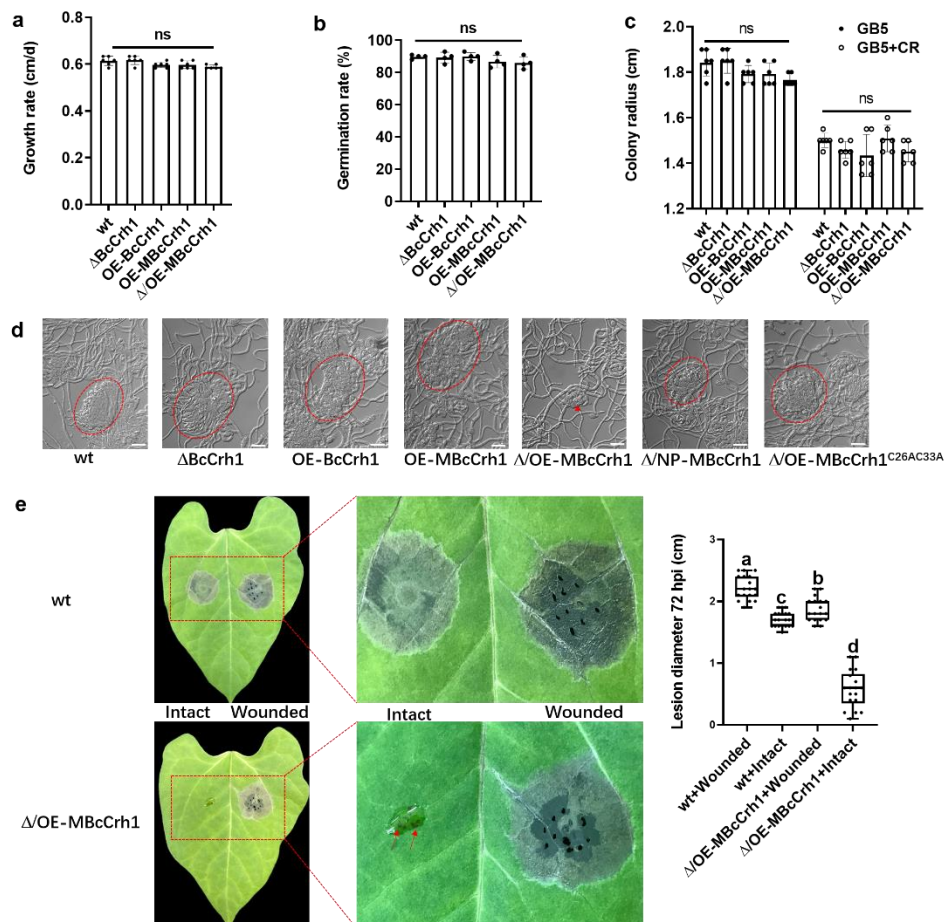

94 **Supplementary Fig. 10.** PCR validation of *B. cinerea* mutant strains. **a** Analysis of *bccrh1* deletion strains  $\Delta$ BcCrh1-2 and  
 95  $\Delta$ BcCrh1-9. **b-c** RT-PCR analysis of *bccrh1* expression in different over-expression strains. The *bcactin* gene was used as  
 96 normalizer. **d** Confirmation of BiFC expression cassettes. Genomic DNA was extracted from the different strains (N'GFP-  
 97 BcCrh1/C'GFP-BcCrh1, N'GFP-BcCrh1<sup>C26AC33A</sup>/C'GFP-BcCrh1<sup>C26AC33A</sup> and N'GFP/C'GFP-BcCrh1) and presence of the  
 98 BiFC cassette was verified by PCR. NTC – no template control, ddH<sub>2</sub>O was used as negative control. Images are from a single  
 99 experiment that was repeated twice with similar results.  
 100

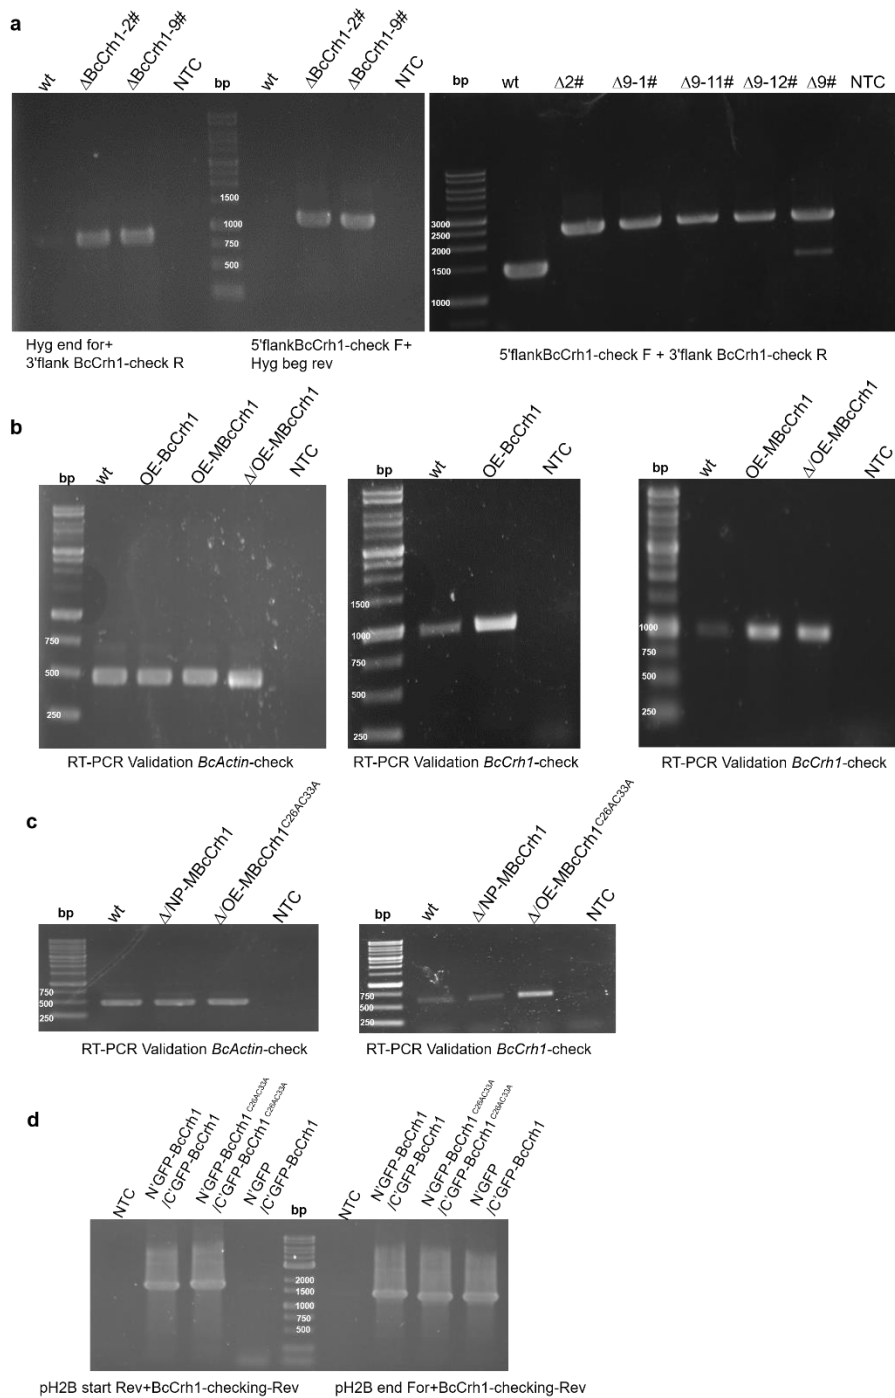

102 **Supplementary Fig. 11. Expression of recombinant proteins.**  $\alpha$ -GFP antibody and  $\alpha$ -His antibody were used to detect  
 103 protein expression by Western blot analysis. **a1-a5** Protein fused with GFP tag that were extracted from *N. benthamiana*  
 104 leaves following Agroinfiltration. **b** Proteins isolated from *A. thaliana* transgenic lines expressing the BcCrh1-GFP protein  
 105 (Line1 and Line2) and the empty vector (EV). **c1** Proteins fused with GFP tag that were produced in *E. coli*. **c2** Coomassie  
 106 blue staining and Western blots with  $\alpha$ -His antibody of proteins with His tag that were produced in *E. coli*. Black arrows  
 107 indicate the expected products with nonspecific bands. Images are from a single experiment that was repeated twice with  
 108 similar results.

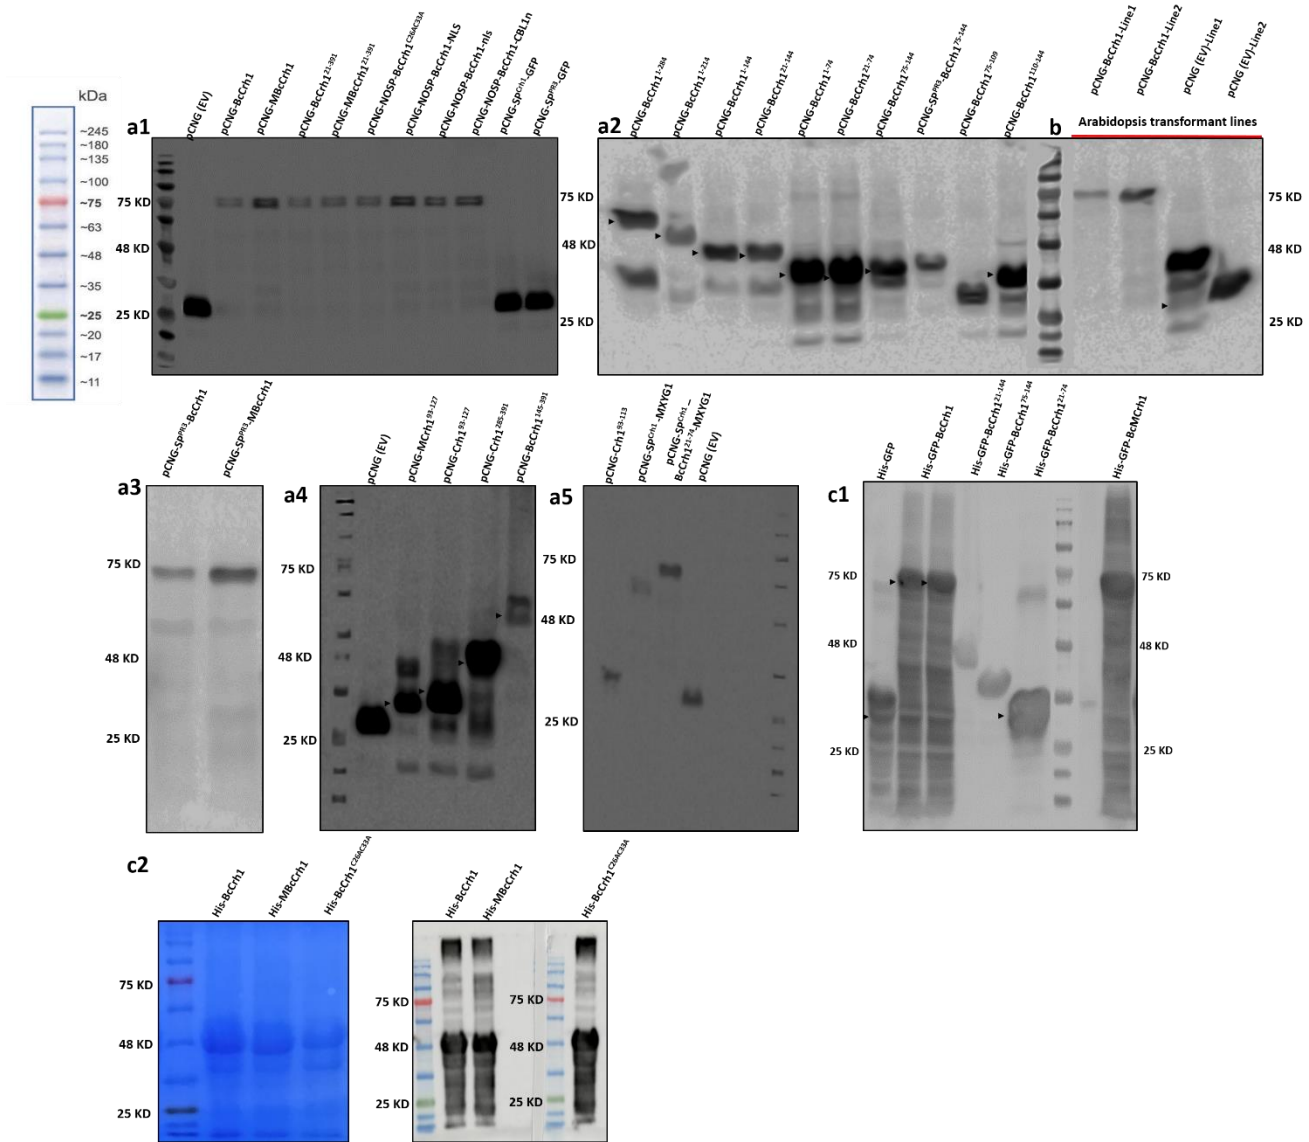

109

110

111 **Supplementary Tables**

112

113 **Supplemental Table 1. List of Oligonucleotides used in this study.**

| <b>Primer purpose</b>                                  | <b>Primer name and sequence (5'- 3')</b>                                                                                                                                                                               |
|--------------------------------------------------------|------------------------------------------------------------------------------------------------------------------------------------------------------------------------------------------------------------------------|
| <i>BcCrhI</i> transient expression with native SP      | <i>BcCrhI</i> -TE F:<br>ccatttacgaacgatagcatctagaATGCGTTCCTCAACAATATC<br><i>BcCrhI</i> -TE R:<br>ccccggggtaccgtcgacggatccCATAACGAGATAACCTAATCC                                                                         |
| <i>BcCrhI</i> transient expression without SP          | <i>BcCrhI</i> <sup>21-391</sup> -TE F:<br>ccatttacgaacgatagcatctagaATGCAAACATTCAGTATTGCAA<br><i>BcCrhI</i> <sup>21-391</sup> -TE R:<br>ccccggggtaccgtcgacggatccCATAACGAGATAACCTAATCC                                   |
| <i>BcCrhI</i> transient expression with plant SP (PR3) | <i>SP</i> (PR3)- <i>BcCrhI</i> <sup>21-391</sup> -TE F:<br>ccatttacgaacgatagcatctagaATGAAGACTAATCTTTTTCTCT<br><i>SP</i> (PR3)- <i>BcCrhI</i> <sup>21-391</sup> -TE R:<br>ccccggggtaccgtcgacggatccCATAACGAGATAACCTAATCC |
| <i>BcCrhI</i> <sup>1-284</sup> transient expression    | <i>BcCrhI</i> <sup>1-284</sup> -TE F:<br>ccatttacgaacgatagcatctagaATGCGTTCCTCAACAATATC<br><i>BcCrhI</i> <sup>1-284</sup> -TE R:<br>ctccccggggtaccgtcgacggatccAGCTGATCCGTCGGCGCTGCA                                     |
| <i>BcCrhI</i> <sup>1-214</sup> transient expression    | <i>BcCrhI</i> <sup>1-214</sup> -TE F:<br>ccatttacgaacgatagcatctagaATGCGTTCCTCAACAATATC<br><i>BcCrhI</i> <sup>1-214</sup> -TE R:<br>ctccccggggtaccgtcgacggatccGGCACATCCGATCCAGCTTC                                      |
| <i>BcCrhI</i> <sup>1-144</sup> transient expression    | <i>BcCrhI</i> <sup>1-144</sup> -TE F:<br>ccatttacgaacgatagcatctagaATGCGTTCCTCAACAATATC<br><i>BcCrhI</i> <sup>1-144</sup> -TE R:<br>ctccccggggtaccgtcgacggatccCGTCGTGTTTCCCTTTCCGA                                      |
| <i>BcCrhI</i> <sup>1-74</sup> transient expression     | <i>BcCrhI</i> <sup>1-74</sup> -TE F:<br>ccatttacgaacgatagcatctagaATGCGTTCCTCAACAATATC<br><i>BcCrhI</i> <sup>1-74</sup> -TE R:<br>ctccccggggtaccgtcgacggatccGACGAATTGGGCACCGAGG                                         |
| <i>BcCrhI</i> <sup>21-74</sup> transient expression    | <i>BcCrhI</i> <sup>21-74</sup> -TE F:<br>ccatttacgaacgatagcatctagaATGCAAACATTCAGTATTGCAA<br><i>BcCrhI</i> <sup>21-74</sup> -TE R:<br>ctccccggggtaccgtcgacggatccGACGAATTGGGCACCGAGG                                     |
| <i>BcCrhI</i> <sup>75-144</sup> transient expression   | <i>BcCrhI</i> <sup>75-144</sup> -TE F:<br>ccatttacgaacgatagcatctATGATTAGCACAGCAACCGATGCAC<br><i>BcCrhI</i> <sup>75-144</sup> -TE R:<br>ctccccggggtaccgtcgacggatccCGTCGTGTTTCCCTTTCCGA                                  |
| <i>BcCrhI</i> <sup>145-391</sup> transient expression  | <i>BcCrhI</i> <sup>75-391</sup> -TE F:<br>ccatttacgaacgatagcatctATGACCTATGACCGTGCTCAATAC                                                                                                                               |

---

|                                                                                              |                                                                                                                                                                                                    |
|----------------------------------------------------------------------------------------------|----------------------------------------------------------------------------------------------------------------------------------------------------------------------------------------------------|
|                                                                                              | <i>BcCrhI</i> <sup>75-391</sup> -TE R:<br>ccccggggtaccgtcgacgatccCATAACGAGATAACCTAATCC                                                                                                             |
| <i>BcCrhI</i> <sup>75-144</sup> transient expression with plant SP (PR3)                     | SP (PR3) <i>BcCrhI</i> <sup>75-144</sup> -TE F:<br>ccatttacgaacgatagcatctagaATGAAGACTAATCTTTTTCTCT<br><i>BcCrhI</i> <sup>75-144</sup> -TE R:<br>ctccccggggtaccgtcgacgatccCGTCGTGTTTCCCTTTCCGA      |
| <i>BcCrhI</i> <sup>75-109</sup> transient expression                                         | <i>BcCrhI</i> <sup>75-109</sup> -TE F:<br>ccatttacgaacgatagcatctATGATTAGCACAGCAACCGATGCAC<br><i>BcCrhI</i> <sup>75-109</sup> -TE R:<br>ctccccggggtaccgtcgacggaACTGACGATACCAGTTCCG                  |
| <i>BcCrhI</i> <sup>110-144</sup> transient expression                                        | <i>BcCrhI</i> <sup>110-144</sup> -TE F:<br>ccatttacgaacgatagcatctATGAGTTTTATTCTCGAATCCGA<br><i>BcCrhI</i> <sup>110-144</sup> -TE R:<br>ctccccggggtaccgtcgacgatccCGTCGTGTTTCCCTTTCCGA               |
| <i>BcCrhI</i> <sup>93-127</sup> transient expression                                         | <i>BcCrhI</i> <sup>92-127</sup> -TE F:<br>ccatttacgaacgatagcatctATGGGTTCGCATCGAGACATGGGTG<br><i>BcCrhI</i> <sup>92-127</sup> -TE R:<br>ctccccggggtaccgtcgacggaACCGAGCCATTCCCAATCAA                 |
| <i>MBcCrhI</i> <sup>93-127</sup> transient expression                                        | <i>MBcCrhI</i> <sup>92-127</sup> -TE F:<br>ccatttacgaacgatagcatctATGGGTTCGCATCGAGACATGGGTG<br><i>MBcCrhI</i> <sup>92-127</sup> -TE R:<br>ctccccggggtaccgtcgacggaACCGAGCCATTGCCAATGAA<br>TCTGATCGAG |
| <i>BcCrhI</i> <sup>93-113</sup> transient expression                                         | <i>BcCrhI</i> <sup>92-113</sup> -TE F:<br>ccatttacgaacgatagcatctATGGGTTCGCATCGAGACATGGGTG<br><i>BcCrhI</i> <sup>92-113</sup> -TE R:<br>ctccccggggtaccgtcgacggaGAGAATAAACTACTGACG                   |
| <i>SP(BcCrhI)-GFP</i> transient expression<br>35S: <i>SP(BcCrhI)</i> cloning                 | <i>SP(BcCrhI)-GFP</i> -TE F:<br>TAAAACGACGGCCAGTGCCAAGCTTAGCTTGCATGCCTGCAGG<br><i>SP(BcCrhI)-GFP</i> -TE F:<br>CCCGCTCCCCGGGGTACCTGCACTGGCAAGTCTGAAAG                                              |
| <i>BcCrhI</i> <sup>C26AC33A</sup> transient expression                                       | <i>BcCrhI</i> <sup>C26AC33A</sup> -TE F:<br>CCATTACGAACGATAGCATCTAGAATGCAAACATTCCTGAT<br>GCTAAC<br><i>BcCrhI</i> <sup>C26AC33A</sup> -TE R:<br>ccccggggtaccgtcgacgatccCATAACGAGATAACCTAATCC        |
| <i>BcXYGI</i> Fused with <i>SP(BcCrhI)</i> and <i>GFP</i> transient expression               | <i>SP(BcCrhI)- BcXYGI</i> F:<br>ATGCGTTCCTCAACAATATCAGCATCTGCTGTTGTTCTCCTTTC<br>AGGACTTGCCAGTGCAAACCTACTCCTACTCTTG<br><i>BcXYGI-GFP</i> R:<br>ctccccggggtaccgtcgacgatccATTGAGCGAGACGGAGTAG         |
| <i>BcXYGI</i> Fused with <i>SP(BcCrhI)- BcCrhI</i> <sup>21-74</sup> and <i>GFP</i> transient | <i>SP(BcCrhI)- BcCrhI</i> <sup>21-74</sup> F:<br>ccatttacgaacgatagcatctagaATGCGTTCCTCAACAATATC                                                                                                     |

---

---

|                                                                                                 |                                                                                                                                                                                                                                                                                                                                                                          |
|-------------------------------------------------------------------------------------------------|--------------------------------------------------------------------------------------------------------------------------------------------------------------------------------------------------------------------------------------------------------------------------------------------------------------------------------------------------------------------------|
| expression                                                                                      | <p><i>SP(BcCrhI)- BcCrhI<sup>21-74</sup> R:</i><br/> GACGAATTGGGCACCGAGG</p> <p><i>BcCrhI-BcXYGI F:</i><br/> CCTCGGTGCCCAATTCGTCAACCCTACTCCTACTCTTG</p> <p><i>BcCrhI-BcXYGI R:</i><br/> ctccccgggggtaccgtcgacggatccATTGAGCGAGACGGAGTAG</p>                                                                                                                               |
| <i>BcCrhI</i> over-expression                                                                   | <p><i>BcCrhI-OE F:</i><br/> attggegcccATGCGTTCCTCAACAATATCAGC</p> <p><i>BcCrhI-OE R:</i><br/> gcggccgcTTAAGCGTAATCTGGAACATCGTATGGGTACATAACG<br/> AGATAACCTAATCCGAGAC</p>                                                                                                                                                                                                 |
| <i>MBcCrhI</i> over-expression in wt and <i>bccrhI</i> deletion mutant background               | <p><i>MBcCrhI-OE (PoliC-MBcCrhI) F:</i><br/> CCATCACATCACAAATCGATCCAACCATGCGTTCCTCAACAATA<br/> TCAGCAT</p>                                                                                                                                                                                                                                                               |
| <i>MBcCrhI<sup>C26AC33A</sup></i> over-expression in <i>bccrhI</i> deletion mutant background   | <p><i>MBcCrhI-OE (MBcCrhI-Tgluc) R:</i><br/> CATACATCTTATCTACATACGCTAAGCGGCCGCCATAACGAGA<br/> TAACCTAATCCGAGA</p>                                                                                                                                                                                                                                                        |
| <i>BcCrhI</i> -GFP fused protein under control of the native <i>bccrhI</i> promoter             | <p><i>PtpC-promoter of BcCrhI F:</i><br/> GCCCAAAAATGCTCCTTCAATATCACTAGTTTCATATGCTTTG<br/> GAAATGGGATGG</p> <p><i>Promoter of BcCrhI R:</i><br/> GCTGATATTGTTGAGGAACGCATCTTGAAATATGTGATGTGTG<br/> TGTGC</p> <p><i>BcCrhI F:</i><br/> ATGCGTTCCTCAACAATATCAGCAT</p> <p><i>BcCrhI-GFP-R:</i><br/> TACTTACCTCACCCCTTGAAACCATCATAACGAGATAACCTAA<br/> TCCGAGA</p>             |
| <i>MBcCrhI</i> under control of the native promoter in <i>bccrhI</i> deletion mutant background | <p><i>PtpC-promoter of BcCrhI F:</i><br/> GCCCAAAAATGCTCCTTCAATATCACTAGTTTCATATGCTTTG<br/> GAAATGGGATGG</p> <p><i>promoter of BcCrhI R:</i><br/> GCTGATATTGTTGAGGAACGCATCTTGAAATATGTGATGTGTG<br/> TGTGC</p> <p><i>MBcCrhI F:</i><br/> ATGCGTTCCTCAACAATATCAGCAT</p> <p><i>MBcCrhI-Tgluc-R:</i><br/> CATACATCTTATCTACATACGCTAAGCGGCCGCCATAACGAGA<br/> TAACCTAATCCGAGA</p> |
| <i>BcCrhI/MBcCrhI</i> expression in <i>E. coli</i>                                              | <p><i>BcCrhI pET14b F:</i><br/> AACCTGTACTTCCAGGGTCATATGCAAACATTCAGTATTG</p> <p><i>BcCrhI pET14b R:</i></p>                                                                                                                                                                                                                                                              |

---

---

|                                                                                                                 |                                                                                                                                                                                                    |
|-----------------------------------------------------------------------------------------------------------------|----------------------------------------------------------------------------------------------------------------------------------------------------------------------------------------------------|
|                                                                                                                 | CCGGCCATGGAAAAAAAAACATTACATAACGAGATAACCTAA<br>TC                                                                                                                                                   |
| <i>BcCrhI</i> <sup>21-144</sup> expression in <i>E. coli</i>                                                    | <i>BcCrhI</i> <sup>21-144</sup> pET14b F:<br>AACCTGTACTIONTCCAGGGTCATATGCAAACATTCACTGATTGC<br><i>BcCrhI</i> <sup>21-144</sup> pET14b R:<br>TCGGGCTTTGTTAGCAGCCGTTACGTCGTGTTTCCCTTTCCGA             |
| <i>BcCrhI</i> <sup>75-144</sup> expression in <i>E. coli</i>                                                    | <i>BcCrhI</i> <sup>75-144</sup> pET14b F:<br>AACCTGTACTIONTCCAGGGTCATATGATTAGCACAGCAACCGAT<br>GCAC<br><i>BcCrhI</i> <sup>75-144</sup> pET14b R:<br>TCGGGCTTTGTTAGCAGCCGTTACGTCGTGTTTCCCTTTCCGA     |
| Generate pET14b linearized vector<br>skeleton for cloning                                                       | pET14b-GFP F:<br>CGGCTGCTAACAAAGCCCGAAAGG<br>pET14b-GFP R:<br>CATATGACCCTGGAAGTACAGG                                                                                                               |
| <i>BcCrhI</i> replacement vector upstream<br>Amplify 5' flank of <i>BcCrhI</i>                                  | pTZ-5'flank <i>BcCrhI</i> F:<br>ggtaacgccagggtttcccagtcacgacgCCCCGCCCTCGTTTGCTTACAG<br>TGAC<br>HygTer-5'flank <i>BcCrhI</i> R:<br>cctttttttcaggaattattctcacagtCTTGAAATATGTGATGTGTGTGTGCG<br>TG     |
| <i>BcCrhI</i> replacement vector downstream<br>Amplify 3' flank of <i>BcCrhI</i>                                | OliCProm-3'flank <i>BcCrhI</i> F:<br>gatctagatgattcgcgaggtaccgagctACCTGATAACGAGAAATTCCAG<br>GAAAG<br>pTZ-3'flank <i>BcCrhI</i> R:<br>agcggataacaatttcacacaggaaacagcCATGGGAGTATTGCATCAGGTAT<br>CACC |
| Amplify <i>hph</i> cassette                                                                                     | OliCProm-Hyg-pOnex F:<br>AGCTCGGTACCTCGCGAATGC<br>ToACR R:<br>ACTGTGAGAATAATTCCTG                                                                                                                  |
| Check <i>BcCrhI</i> deletion                                                                                    | 5'flank <i>BcCrhI</i> -check F:<br>TTTCATGACAATGCTGAAAACCTTC<br>3'flank <i>BcCrhI</i> -check R:<br>GAGATGTTGAGAATCTAATTACTATT                                                                      |
| Used to check homologous recombination<br>of <i>hph</i> -containing cassette                                    | Hyg end for:<br>ATTCCCAATACGAGGTCGCCAACATCTTCTTC<br>Hyg beg rev:<br>GAGATGCAATAGGTCAGGCTCTCGCTGAATTC                                                                                               |
| Used to check the expression cassettes of<br>pH2B: <i>N'GFP-BcCrhI</i> and pH2B: <i>C'GFP-</i><br><i>BcCrhI</i> | pH2B start Rev: caaaacatctctctccatccaccaaaac<br>pH2B end For: actcatcaatcaatctcagcc                                                                                                                |
| To amplify part of the open reading frame                                                                       | <i>BcCrhI</i> -check For:                                                                                                                                                                          |

---

---

|                                                             |                                                                                                                                                                                                                                                                                                                                                                                                                                                                                                                                                                                                                                                                                                                                    |
|-------------------------------------------------------------|------------------------------------------------------------------------------------------------------------------------------------------------------------------------------------------------------------------------------------------------------------------------------------------------------------------------------------------------------------------------------------------------------------------------------------------------------------------------------------------------------------------------------------------------------------------------------------------------------------------------------------------------------------------------------------------------------------------------------------|
| of <i>BcCrh1</i>                                            | AGAAAAGACCTGTCCTTCAGACCCA<br><i>BcCrh1</i> -check Rev:<br>AAGATCAATCATGCCGTATTCGTGC                                                                                                                                                                                                                                                                                                                                                                                                                                                                                                                                                                                                                                                |
| To amplify part of the open reading frame of <i>BcActin</i> | <i>BcActin</i> -check F:<br>CCCAATCAACCCAAAGTCCAACAG<br><i>BcActin</i> -check R:<br>CCACCGCTCTCAAGACCCAAGA                                                                                                                                                                                                                                                                                                                                                                                                                                                                                                                                                                                                                         |
| Y2H assay                                                   | <i>AD-BcCrh1</i> F:<br>tatggccatggaggccagtgaattcCAAACATTCACTGATTGC<br><i>AD-BcCrh1</i> R:<br>tctgcagctcgagctcgatgTTACATAACGAGATAACCTAATC<br><i>BD-BcCrh1</i> F:<br>GCATATGGCCATGGAGGCCGAATTCCAAACATTCACTGATTGC<br><i>BD-BcCrh1</i> R:<br>GCGGCCGCTGCAGGTTCGACGTTACATAACGAGATAACCTAATC<br><i>BD-BcCrh1</i> <sup>C26AC33A</sup> F:<br>GCATATGGCCATGGAGGCCCAAACATTCACTGATGCTAACCC<br>AACAGAAAAGACCGCTCCTTCAGACCCAGCCATTG<br><i>BD-BcCrh1</i> - <sup>C26A</sup> F:<br>GCATATGGCCATGGAGGCCGAATTCCAAACATTCACTGATGCTAACCC<br>AACCCAAACAGAAAAGACCGCT<br><i>AD-BcCrh1</i> <sup>Δ21-38</sup> F:<br>TATGGCCATGGAGGCCAGTGAATTCATTGGAGGCCCTCAAGTGACC<br><i>AD-BcCrh1</i> <sup>Δ21-38</sup> R:<br>GCATATGGCCATGGAGGCCGAATTCATTGGAGGCCCTCAAGTGACC |
| <i>BcCrh1</i> for qRT-PCR                                   | <i>BcCrh1</i> -q F: TGATTGCAACCCAACAGAAA<br><i>BcCrh1</i> -q R: GGTTGCTGTGCTAATGACGA                                                                                                                                                                                                                                                                                                                                                                                                                                                                                                                                                                                                                                               |
| <i>B. cinerea Bcgpdh</i> for qRT-PCR                        | <i>Bcgpdh</i> -q F: CGAAGAATAGCACAAACAGCTGGAC<br><i>Bcgpdh</i> -q R: CGTCACCTTATGCTTCTTGCTCC                                                                                                                                                                                                                                                                                                                                                                                                                                                                                                                                                                                                                                       |
| <i>S. lycopersicum LoxD</i> for qRT-PCR                     | <i>LoxD</i> -q F: GGCTTGCTTTACTCCTGGTC<br><i>LoxD</i> -q R: AAATCAAAGCGCCAGTTCTT                                                                                                                                                                                                                                                                                                                                                                                                                                                                                                                                                                                                                                                   |
| <i>S. lycopersicum PR1a</i> for qRT-PCR                     | <i>PR1a</i> -q F: TGGTATGGCGTAAGTCGGTA<br><i>PR1a</i> -q R: CTTGGAATCAAAGTCCGGTT                                                                                                                                                                                                                                                                                                                                                                                                                                                                                                                                                                                                                                                   |
| <i>S. lycopersicum ACS6</i> for qRT-PCR                     | <i>ACS6</i> -q F: CCTGGTTGTTTCATTTCATTGCTCAGAG<br><i>ACS6</i> -q R: GCAACTTCAACTCCCTTATTTGGTTGTAA                                                                                                                                                                                                                                                                                                                                                                                                                                                                                                                                                                                                                                  |
| <i>S. lycopersicum LRR22</i> for qRT-PCR                    | <i>LRR22</i> -q F: AAGATTGGAGGTTGCCATTGGAGC<br><i>LRR22</i> -q R: ATCGCGATGAATGATCGGTGGAGT                                                                                                                                                                                                                                                                                                                                                                                                                                                                                                                                                                                                                                         |
| <i>S. lycopersicum PI-II</i> for qRT-PCR                    | <i>PI-II</i> -q F: CCTATTCAAGATGTCCCCGTTTC<br><i>PI-II</i> -q R: GGGCAATCCAGAAGATGG                                                                                                                                                                                                                                                                                                                                                                                                                                                                                                                                                                                                                                                |

---



---

|                                                                               |                                                                                                                                              |
|-------------------------------------------------------------------------------|----------------------------------------------------------------------------------------------------------------------------------------------|
| <i>S. lycopersicum NPR1</i> for qRT-PCR                                       | <i>NPR1</i> -q F: CCCTGGCTAGCATGAGGAAG<br><i>NPR1</i> -q R: AGAGAGAGCCCTAAGCCGAT                                                             |
| <i>S. lycopersicum OPR3</i> for qRT-PCR                                       | <i>OPR3</i> -q F: CTTTGAGGAACGCGTATCAGG<br><i>OPR3</i> -q R: TGACACGAGATCAGCATCACC                                                           |
| <i>S. lycopersicum actin</i> for qRT-PCR                                      | <i>actin</i> -q F: TGAGCTTCGAGTTGCTCCTGA<br><i>actin</i> -q R: AGCACAGCCTGGATAGCAACA                                                         |
| <i>A. thaliana UBQ10</i> for qRT-PCR                                          | <i>UBQ10</i> -q F: AGATCCAGGACAAGGAAGGTATTC<br><i>UBQ10</i> -q R: CGCAGGACCAAGTGAAGAGTAG                                                     |
| <i>A. thaliana NPR1</i> for qRT-PCR                                           | <i>NPR1</i> -q F: TGCATCAGAAGCAACTTTGG<br><i>NPR1</i> -q R: GGCCTTTGAGAGAATGCTTG                                                             |
| <i>A. thaliana PR5</i> for qRT-PCR                                            | <i>PR5</i> -q F: GTCAATTCAAATCCTCCATCG<br><i>PR5</i> -q R: CGCAGGACCAAGTGAAGAGTAG                                                            |
| <i>A. thaliana PAD4</i> for qRT-PCR                                           | <i>PAD4</i> -q F: TCTTCAGTTAAAGATCAAGGAAGG<br><i>PAD4</i> -q R: GGTTGAATGGCCGGTTATC                                                          |
| <i>A. thaliana PDF1.2</i> for qRT-PCR                                         | <i>PDF1.2</i> -q F: GTTCTCTTTGCTGCTTTTCGAC<br><i>PDF1.2</i> -q R: GCAAACCCCTGACCATGT                                                         |
| <i>A. thaliana LOX3</i> for qRT-PCR                                           | <i>LOX3</i> -q F: CGCCAATCAACAGTTTCTGA<br><i>LOX3</i> -q R: CTCGTCTCGTGGCACATACA                                                             |
| BcXYG1 <sup>E120Q/D122H/E124Q</sup> enzymatic activity site-directed mutation | BcXYG1 <sup>E120Q/D122H/E124Q</sup> F:<br>CTCGATCAGATTCATTGGCAATGGCT<br>BcXYG1 <sup>E120Q/D122H/E124Q</sup> R:<br>AGCCATTGCCAATGAATCTGATCGAG |

---

114

115

**Supplemental Table 2. List of *B. cinerea* and yeast strains used in this study.**

| Strain                                                             | Genotype and description                                                                                                                                                                                                          | Source                    |
|--------------------------------------------------------------------|-----------------------------------------------------------------------------------------------------------------------------------------------------------------------------------------------------------------------------------|---------------------------|
| B05.10                                                             | Haploidized <i>B. cinerea</i> wild type strain                                                                                                                                                                                    | Shlezinger et al., (2016) |
| $\Delta bccrh1$                                                    | <i>bccrh1</i> deletion mutant                                                                                                                                                                                                     | This work                 |
| OE-BcCrh1                                                          | Over expression strain of the native form of BcCrh1                                                                                                                                                                               | This work                 |
| OE-MBcCrh1                                                         | Over expression strain of the mutated form of BcCrh1 that has no enzymatic activity in wild-type background                                                                                                                       | This work                 |
| NP-BcCrh1-GFP                                                      | BcCrh1-GFP fused protein under control of the native <i>bccrh1</i> promoter                                                                                                                                                       | This work                 |
| $\Delta$ /OE-MBcCrh1                                               | Over expression strain of the mutated form of BcCrh1 that has no enzymatic activity in <i>bccrh1</i> deletion background                                                                                                          | This work                 |
| $\Delta$ /NP-MBcCrh1                                               | Mutant strain of the enzymatic inactive BcCrh1 protein under control of the native <i>bccrh1</i> promoter in <i>bccrh1</i> deletion background                                                                                    | This work                 |
| $\Delta$ /OE-MBcCrh1 <sup>C26AC33A</sup>                           | Over expression strain of the mutated form of BcCrh1 that lost both enzymatic activity and homodimer activity in <i>bccrh1</i> deletion background                                                                                | This work                 |
| N'GFP-BcCrh1 /C'GFP-BcCrh1                                         | BiFC assay, BcCrh1 was fused with N'GFP and C'GFP, respectively. Co-expressing of the N'GFP-BcCrh1 and C'GFP-BcCrh1 was controlled by <i>B. cinerea</i> H2B promoter.                                                             | This work                 |
| N'GFP-BcCrh1 <sup>C26AC33A</sup> /C'GFP-BcCrh1 <sup>C26AC33A</sup> | BiFC assay, BcCrh1 <sup>C26AC33A</sup> was fused with N'GFP and C'GFP, respectively. Co-expressing of the N'GFP-BcCrh1 <sup>C26AC33A</sup> and C'GFP-BcCrh1 <sup>C26AC33A</sup> was controlled by <i>B. cinerea</i> H2B promoter. | This work                 |
| N'GFP /C'GFP-BcCrh1                                                | BiFC assay, BcCrh1 was fused with C'GFP only. Co-expressing of the N'GFP and C'GFP-BcCrh1 was controlled by <i>B. cinerea</i> H2B promoter.                                                                                       | This work                 |
| OE-GFP                                                             | Over expression strain of the free GFP protein                                                                                                                                                                                    | This work                 |
| BY4741                                                             | MATa his3 $\Delta$ 1 leu2 $\Delta$ 0 met15 $\Delta$ 0 ura3 $\Delta$ 0                                                                                                                                                             | Cabib E et al., (2007)    |
| GRA007 (crh1 $\Delta$ crh2 $\Delta$ )                              | MATa his3 $\Delta$ 1 leu2 $\Delta$ 0 ura3 $\Delta$ 0 crh2::HIS3 crh1::hphMX4                                                                                                                                                      | Cabib E et al., (2007)    |
| crh1 $\Delta$ crh2 $\Delta$ /BcCrh1                                | Yeast strain of the BcCrh1 protein under control of <i>CRH2</i> promoter and terminator in GRA007 background                                                                                                                      | This work                 |

---

|                                                        |                                                                                                                                                                                            |           |
|--------------------------------------------------------|--------------------------------------------------------------------------------------------------------------------------------------------------------------------------------------------|-----------|
| <i>crh1</i> Δ <i>crh2</i> Δ/MBcCrh1                    | Yeast strain of the enzymatic inactive BcCrh1 protein under control of <i>CRH2</i> promoter and terminator in GRA007 background                                                            | This work |
| <i>crh1</i> Δ <i>crh2</i> Δ/BcCrh1 <sup>C26AC33A</sup> | Yeast strain of the BcCrh1 <sup>C26AC33A</sup> protein (the mutated form of BcCrh1 that lost homodimer activity) under control of <i>CRH2</i> promoter and terminator in GRA007 background | This work |

---
